# Supplementary material for: Snail-regulated exosomal microRNA-21 suppresses NLRP3 inflammasome activity to enhance cisplatin resistance
Source: HighWire-hosted journal article supplement (doi:10.1136/jitc-2022-004832), 2022-08-01
Supplement: jitc-2022-004832supp015_data_supplement.pdf [file jitc-2022-004832supp015_data_supplement.pdf]

**Supplementary table 14. Antibodies, primers, plasmids, reagents, clinical samples, and other materials used in this study**

| REAGENT or RESOURCE                                   | SOURCE                                        | IDENTIFIER  |
|-------------------------------------------------------|-----------------------------------------------|-------------|
| Antibodies                                            |                                               |             |
| Anti-CD63 Antibody, clone RFAC4                       | Merck KGaA, Burlington, MA                    | CBL553      |
| Anti-CD81 antibody                                    | GeneTex, Inc, Irvine, CA                      | GTX101766   |
| Alix (3A9) Mouse mAb                                  | Cell Signaling Technology, Inc, Danvers, MA   | #2171       |
| Snail (L70G2) Mouse mAb, for WB                       | Cell Signaling Technology, Inc, Danvers, MA   | #3895       |
| Snail polyclonal antibody, for IHC                    | Abnova Corporation, Taipei, Taiwan            | PAB1924     |
| Monoclonal ANTI-FLAG® M2 antibody                     | Merck KGaA, Burlington, MA                    | F1804       |
| Purified anti-HA.11 Epitope Tag Antibody              | BioLegend, Inc, San Diego, CA                 | 901502      |
| Anti-Caspase-1 antibody                               | Abcam plc, Cambridge, UK                      | ab17820     |
| IL-1 $\beta$ Antibody (H-153)                         | Santa Cruz Biotechnology, Inc, Santa Cruz, CA | sc-7884     |
| Anti-IL-6 antibody [B-E8]                             | Abcam plc, Cambridge, UK                      | ab11449     |
| Human IL-8/CXCL8 Antibody                             | R&D Systems, Inc, Minneapolis, MN             | AF-208-NA   |
| Human CCL2/JE/MCP-1 Antibody                          | R&D Systems, Inc, Minneapolis, MN             | AF-279-NA   |
| Human CCL5/RANTES Antibody                            | R&D Systems, Inc, Minneapolis, MN             | AF-278-NA   |
| ASC Antibody (N-15), for WB and IP                    | Santa Cruz Biotechnology, Inc, Santa Cruz, CA | sc-22514-R  |
| ASC/TMS1 Antibody, for PLA                            | Novus Biologicals, Centennial, CO             | NBP1-78977  |
| anti-NLRP3/NALP3, mAb antibody (Cryo-2)               | Adipogen Life Sciences, San Diego, CA         | AG-20B-0014 |
| K63-linkage Specific Polyubiquitin (D7A11) Rabbit mAb | Cell Signaling Technology, Inc, Danvers, MA   | #5621       |
| CD14 MicroBeads, human                                | Miltenyi Biotec, Bergisch Gladbach, Germany   | 130-050-201 |
| IFN gamma Monoclonal Antibody (XMG1.2)                | Thermo Fisher Scientific Inc, Waltham, MA     | 17-7311     |
| CD8a Antibody, anti-mouse, PE                         | Miltenyi Biotec, Bergisch Gladbach, Germany   | 130-102-595 |
| PE/Cyanine7 anti-mouse CD45 Antibody                  | BioLegend, Inc, San Diego, CA                 | 103114      |
| APC anti-mouse F4/80 Antibody                         | BioLegend, Inc, San Diego, CA                 | 123116      |
| PE/Cyanine7 Rat IgG2b, $\kappa$ Isotype Ctrl Antibody | BioLegend, Inc, San Diego, CA                 | 400617      |

|                                                                                               |                                               |                                       |
|-----------------------------------------------------------------------------------------------|-----------------------------------------------|---------------------------------------|
| APC Rat IgG2a, $\kappa$ Isotype Ctrl Antibody                                                 | BioLegend, Inc, San Diego, CA                 | 400511                                |
| CD68                                                                                          | Agilent Technologies, Inc, Santa Clara, CA    | M0876                                 |
| Goat anti-Mouse IgG                                                                           | Thermo Fisher Scientific Inc, Waltham, MA     | F2761                                 |
| Anti-Actin Antibody                                                                           | Thermo Fisher Scientific Inc, Waltham, MA     | MAB1501                               |
| GAPDH (14C10) Rabbit mAb                                                                      | Cell Signaling Technology, Inc, Danvers, MA   | #2118                                 |
| normal mouse IgG                                                                              | Santa Cruz Biotechnology, Inc, Santa Cruz, CA | sc-2025                               |
| BRCC3 (D5E5H) Rabbit mAb                                                                      | Cell Signaling Technology, Inc, Danvers, MA   | #18215                                |
| PTEN (D4.3) XP® Rabbit mAb                                                                    | Cell Signaling Technology, Inc, Danvers, MA   | #9188                                 |
| Anti-CD9 antibody                                                                             | Abcam plc, Cambridge, UK                      | ab92726                               |
| Anti-CD81 antibody                                                                            | GeneTex, Inc, Irvine, CA                      | GTX101766                             |
| Anti-Calreticulin antibody                                                                    | Abcam plc, Cambridge, UK                      | ab39897                               |
| CD45 MicroBeads, mouse                                                                        | Miltenyi Biotec, Bergisch Gladbach, Germany   | 130-052-301                           |
| PerCP anti-mouse F4/80 Antibody                                                               | BioLegend, Inc, San Diego, CA                 | 123126                                |
| Gasdermin D (E8G3F) Rabbit mAb                                                                | Cell Signaling Technology, Inc, Danvers, MA   | #97558                                |
| A20/TNFAIP3 (D13H3) Rabbit mAb                                                                | Cell Signaling Technology, Inc, Danvers, MA   | #5630                                 |
| CD4, for multiplex IHC                                                                        | Thermo Fisher Scientific Inc, Waltham, MA     | Clone: 4B12                           |
| CD8a, for multiplex IHC                                                                       | Thermo Fisher Scientific Inc, Waltham, MA     | Clone: C8/144B                        |
| CD163, for multiplex IHC                                                                      | Thermo Fisher Scientific Inc, Waltham, MA     | Clone: 10D6                           |
| CD68, for multiplex IHC                                                                       | Abcam plc, Cambridge, UK                      | Clone: KPI                            |
| CD66b, for multiplex IHC                                                                      | BD, Franklin Lakes, NJ                        | Clone: G10F5                          |
| PanCK, for multiplex IHC                                                                      | Abcam plc, Cambridge, UK                      | Clone:<br>AE1/AE3+5D3                 |
| <b>Bacterial and Virus Strains</b>                                                            |                                               |                                       |
| Stbl3                                                                                         | Thermo Fisher Scientific Inc, Waltham, MA     | C737303                               |
| <b>Biological Samples</b>                                                                     |                                               |                                       |
| 9 samples from HNSCC patients for multiplex immunofluorescent staining (Figure S1A, Table S1) | Taipei Veterans General Hospital              | TVGH-IRB certificate<br>No.2018-06-00 |

|                                                                                                                |                                                     |                                           |
|----------------------------------------------------------------------------------------------------------------|-----------------------------------------------------|-------------------------------------------|
| 44 tumor samples with 21 normal counterparts from 21 HNSCC patients for RNA-seq analysis (Figure 1B, Table S2) | Taipei Veterans General Hospital                    | TVGH-IRB certificate No.2017-05-013AC IBC |
| 50 samples from HNSCC patients for RT-qPCR (Figure 7B, Table S10)                                              | Taipei Veterans General Hospital                    | TVGH-IRB certificate No. 2014-03-004AC    |
| Serum and tissue samples from 19 HNSCC patients (Figure 7C-D, Table S11)                                       | Taipei Veterans General Hospital                    | TVGH-IRB certificate No. 2014-03-004AC    |
| 5 samples from 5 HNSCC patient for immunofluorescence and PLA (Figure 7E, Table S12)                           | Taipei Veterans General Hospital                    | TVGH-IRB certificate No. 2014-03-004AC    |
| PBMC from healthy donors                                                                                       | Taipei Veterans General Hospital                    | TVGH-IRB certificate No. 2014-03-004AC    |
| <b>Chemicals, Peptides, and Recombinant Proteins</b>                                                           |                                                     |                                           |
| Nigericin sodium salt                                                                                          | Merck KGaA, Burlington, MA                          | N7143                                     |
| Phorbol 12-myristate 13-acetate (PMA)                                                                          | Cayman Chemical, Ann Arbor, MI                      | 10008014                                  |
| Lipopolysaccharides (LPS)                                                                                      | Merck KGaA, Burlington, MA                          | L4391                                     |
| Cisplatin                                                                                                      | Merck KGaA, Burlington, MA                          | PHR1624                                   |
| T-Pro NTR III                                                                                                  | JF Ji-Feng Biotechnology, New Taipei County, Taiwan | JT97-N006M                                |
| Human IFN- $\gamma$                                                                                            | PeproTech, Inc, Cranbury, NJ                        | 300-02                                    |
| Murine Ifn- $\gamma$                                                                                           | PeproTech, Inc, Cranbury, NJ                        | 315-05                                    |
| Human GM-CSF                                                                                                   | PeproTech, Inc, Cranbury, NJ                        | 300-03                                    |
| Murine Gm-csf                                                                                                  | PeproTech, Inc, Cranbury, NJ                        | 315-03                                    |
| 7-AAD Staining Solution                                                                                        | Abcam plc, Cambridge, UK                            | ab228563                                  |
| SYTOX™ Green Nucleic Acid Stain                                                                                | Thermo Fisher Scientific Inc, Waltham, MA           | S7020                                     |
| <b>Critical Commercial Assays</b>                                                                              |                                                     |                                           |
| IL-1 beta Human Instant ELISA™ Kit                                                                             | Thermo Fisher Scientific Inc, Waltham, MA           | BMS224INST                                |
| Mouse Il-1 beta Instant ELISA™ Kit                                                                             | Thermo Fisher Scientific Inc, Waltham, MA           | BMS6002INST                               |
| TA Cloning™ Kit                                                                                                | Thermo Fisher Scientific Inc, Waltham, MA           | K202020                                   |
| Duolink™ In Situ PLA® Probe Anti-Mouse PLUS                                                                    | Merck KGaA, Burlington, MA                          | DUO92001                                  |
| Duolink™ In Situ PLA® Probe Anti-Rabbit MINUS                                                                  | Merck KGaA, Burlington, MA                          | DUO92005                                  |
| Duolink™ In Situ Detection Reagents Red                                                                        | Merck KGaA, Burlington, MA                          | DUO92008                                  |

|                                                                              |                                                                                       |                                                                                                                                                                                       |
|------------------------------------------------------------------------------|---------------------------------------------------------------------------------------|---------------------------------------------------------------------------------------------------------------------------------------------------------------------------------------|
| FLICA 660 Caspase-1 Assay                                                    | ImmunoChemistry Technologies, LLC, Bloomington, MN                                    | #9122                                                                                                                                                                                 |
| Tumor Dissociation Kit, mouse                                                | Miltenyi Biotec, Bergisch Gladbach, Germany                                           | 130-096-730                                                                                                                                                                           |
| Dead Cell Removal Kit                                                        | Miltenyi Biotec, Bergisch Gladbach, Germany                                           | 130-090-101                                                                                                                                                                           |
| Opal Polaris 7 Color IHC Detection Kits                                      | Akoya Biosciences, Inc, Marlborough, MA                                               | NEL861001KT                                                                                                                                                                           |
| <b>Deposited Data</b>                                                        |                                                                                       |                                                                                                                                                                                       |
| TCGA HNSCC RNA sequence data                                                 | National cancer institute, Rockville, MD                                              | <a href="https://www.cancer.gov/about-nci/organization/ccg/research/structural-genomics/tcga">https://www.cancer.gov/about-nci/organization/ccg/research/structural-genomics/tcga</a> |
| TVGH RNA sequence data                                                       | This paper                                                                            | GSE178537                                                                                                                                                                             |
| scRNA-seq of CD45+ cells of MTCQ1-WT/MTCQ1 <sup>mir21-/-</sup> formed tumors | This paper                                                                            | GSE172326                                                                                                                                                                             |
| small RNA sequencing of the cancer cell-secreted exosomes                    | This paper                                                                            | GSE99474                                                                                                                                                                              |
| Visium spatial gene expression data                                          | This paper                                                                            | GSE181300                                                                                                                                                                             |
| <b>Experimental Models: Cell Lines</b>                                       |                                                                                       |                                                                                                                                                                                       |
| Human: FaDu cells                                                            | ATCC, Manassas, VA                                                                    | HTB-43                                                                                                                                                                                |
| Human: OECM1 cells                                                           | Dr. Kuo-Wei Chang's lab                                                               | Hung et al., 2014                                                                                                                                                                     |
| Human: THP-1 cells                                                           | ATCC, Manassas, VA                                                                    | TIB-202                                                                                                                                                                               |
| Human: HEK 293T cells                                                        | ATCC, Manassas, VA                                                                    | CRL-3216                                                                                                                                                                              |
| Mouse: MTC-Q1                                                                | Dr. Kuo-Wei Chang's lab                                                               | (Chen et al., 2019)                                                                                                                                                                   |
| Mouse: LLC1                                                                  | ATCC, Manassas, VA                                                                    | CRL-1642                                                                                                                                                                              |
| Mouse: 4T1                                                                   | ATCC, Manassas, VA                                                                    | CRL-2539                                                                                                                                                                              |
| <b>Experimental Models: Organisms/Strains</b>                                |                                                                                       |                                                                                                                                                                                       |
| Mouse: C57BL/6JNarl                                                          | National Laboratory Animal Center, Taipei, Taiwan                                     | N/A                                                                                                                                                                                   |
| Mouse: BALB/cByJNarl                                                         | National Laboratory Animal Center, Taipei, Taiwan                                     | N/A                                                                                                                                                                                   |
| Mouse: Nlrp3 <sup>-/-</sup>                                                  | Dr. Nien-Jung Chen's lab                                                              | N/A                                                                                                                                                                                   |
| <b>Oligonucleotides</b>                                                      |                                                                                       |                                                                                                                                                                                       |
| miR-21-5p agomir                                                             | Ribobio Corp, Guangzhou, China.                                                       | miR40000790-1-2                                                                                                                                                                       |
| agomir Negative Control                                                      | Ribobio Corp, Guangzhou, China.                                                       | miR04201-1-10                                                                                                                                                                         |
| <b>Recombinant DNA</b>                                                       |                                                                                       |                                                                                                                                                                                       |
| pCDH-CMV-MCS-EF1-puro vector                                                 | System Biosciences                                                                    | CD710B-1                                                                                                                                                                              |
| pMD.G                                                                        | RNA Technology Platform and Gene Manipulation Core of Academia Sinica, Taipei, Taiwan | C6-6-1                                                                                                                                                                                |

|                                                         |                                                                                       |                                                                                       |
|---------------------------------------------------------|---------------------------------------------------------------------------------------|---------------------------------------------------------------------------------------|
| pCMVΔR8.91                                              | RNA Technology Platform and Gene Manipulation Core of Academia Sinica, Taipei, Taiwan | C6-6-1                                                                                |
| pMIR-REPORT                                             | Thermo Fisher Scientific Inc, Waltham, MA                                             | AM5795                                                                                |
| pRK5-HA-Ubiquitin-K63                                   | Addgene, Watertown, MA                                                                | #17606                                                                                |
| pLKO.1-scramble                                         | RNA Technology Platform and Gene Manipulation Core of Academia Sinica, Taiwan         | ASN0000000004                                                                         |
| pLKO.1-SNAI1 shRNA                                      | RNA Technology Platform and Gene Manipulation Core of Academia Sinica, Taiwan         | TRCN0000063818                                                                        |
| pLKO.1-mouse Snai1 shRNA                                | RNA Technology Platform and Gene Manipulation Core of Academia Sinica, Taiwan         | TRCN0000234034                                                                        |
| pGreenPuro control lentivector ( control for pmiRZip21) | System Biosciences, LLC, Palo Alto, CA                                                | SI505A-1                                                                              |
| pmiRZip21 anti-miR-21 expression lentivector            | System Biosciences, LLC, Palo Alto, CA                                                | MZIP21-PA-1                                                                           |
| pcDNA3-Flag-NLRP3                                       | Dr. Szu-Ting Chen's lab                                                               | N/A                                                                                   |
| SgRNA/Cas9-MIR21-1:<br>GTCTGATAAGCTACCCGACAAGG          | Dr. Tsai-Yu Tzeng's lab                                                               | subcloned into PX459 by BbsI site.                                                    |
| SgRNA/Cas9-MIR21-2:<br>TCATGGCAACACCAGTCGATTGG          | Dr. Tsai-Yu Tzeng's lab                                                               | subcloned into PX459 by BbsI site.                                                    |
| SgRNA/Cas9 -mMIR21a-1:<br>GTCTGATAAGCTATCCGACAAGG       | Dr. Tsai-Yu Tzeng's lab                                                               | subcloned into PX459 by BbsI site.                                                    |
| SgRNA/Cas9-mMIR21a-2:<br>TCATGGCAACAGCAGTCGATGGG        | Dr. Tsai-Yu Tzeng's lab                                                               | subcloned into PX459 by BbsI site.                                                    |
| <b>Software and Algorithms</b>                          |                                                                                       |                                                                                       |
| ImageJ                                                  | Schneider et al., 2012                                                                | <a href="https://imagej.nih.gov/ij/">https://imagej.nih.gov/ij/</a>                   |
| GraphPad Prism8                                         | GraphPad Software, San Diego, CA                                                      | <a href="https://www.graphpad.com/">https://www.graphpad.com/</a>                     |
| FV31S-SW                                                | Olympus Corporation, Tokyo, Japan                                                     | <a href="https://www.olympus-global.com/">https://www.olympus-global.com/</a>         |
| Partek Flow                                             | Partek, St. Louis, MO                                                                 | <a href="https://www.partek.com/partek-flow/">https://www.partek.com/partek-flow/</a> |
| CIPR                                                    | N/A                                                                                   | (Ekiz et al., 2020)                                                                   |
| DAVID Bioinformatics Resources 6.8                      | N/A                                                                                   | (Huang da et al., 2009)                                                               |
| GSEA                                                    | N/A                                                                                   | (Subramanian et al., 2005)                                                            |

| Oligonucleotides                  |                                                    |
|-----------------------------------|----------------------------------------------------|
| Primers for reverse transcription | Sequence (5'-3')                                   |
| hsa-mir-21                        | GTCGTATCCAGTGCAGGGTCCGAGGTATTCGCACTGGATACGACTCAACA |
| hsa-mir-10a                       | GTCGTATCCAGTGCAGGGTCCGAGGTATTCGCACTGGATACGACCACAAA |
| hsa-mir-30a                       | GTCGTATCCAGTGCAGGGTCCGAGGTATTCGCACTGGATACGACCTTCCA |
| hsa-mir-30d                       | GTCGTATCCAGTGCAGGGTCCGAGGTATTCGCACTGGATACGACCTTCCA |
| hsa-let-7i                        | GTCGTATCCAGTGCAGGGTCCGAGGTATTCGCACTGGATACGACAACAGC |
| hsa-mir-182                       | GTCGTATCCAGTGCAGGGTCCGAGGTATTCGCACTGGATACGACAGTGTG |
| hsa-mir-191                       | GTCGTATCCAGTGCAGGGTCCGAGGTATTCGCACTGGATACGACCAGCTG |
| hsa-mir-205                       | GTCGTATCCAGTGCAGGGTCCGAGGTATTCGCACTGGATACGACCAGACT |
| hsa-mir-1246                      | GTCGTATCCAGTGCAGGGTCCGAGGTATTCGCACTGGATACGACCCTGCT |
| hsa-mir-4792                      | GTCGTATCCAGTGCAGGGTCCGAGGTATTCGCACTGGATACGACGCCAGC |
| qPCR primers                      | Sequence (5'-3')                                   |
| <i>BRCC3</i> -F                   | TTCCCGATAGTGACATGAGG                               |
| <i>BRCC3</i> -R                   | CAGGCCCAAAAGAGTTCAGA                               |
| miR-21-F                          | GCCGCTTAGCTTATCAGACTGA                             |
| miR-21-R                          | GTGCAGGGTCCGAGGT                                   |
| Ifng-F (m)                        | CGGCACAGTCATTGAAAGCCTA                             |
| Ifng-R (m)                        | GTTGCTGATGGCCTGATTGTC                              |
| <i>CXCL10</i> -F                  | GCAGGTACAGCGTACGGTTC                               |
| <i>CXCL10</i> -R                  | CAGCAGAGGAACCTCCAGTC                               |
| <i>CXCL9</i> -F                   | CCTTAAACAATTTGCCCAA                                |
| <i>CXCL9</i> -R                   | TCACATCTGCTGAATCTGGG                               |
| <i>IFNG</i> -F                    | TGTATTGCTTTGCGTTGGAC                               |
| <i>IFNG</i> -R                    | TGACCAGAGCATCCAAAAGA                               |
| <i>GAPDH</i> -F                   | AAGGTCGGAGTCAACGGATTTG                             |
| <i>GAPDH</i> -R                   | CCATGGGTGGAATCATATTGGAA                            |
| <i>U6</i> -F                      | CTCGCTTCGGCAGCAC                                   |
| <i>U6</i> -R                      | AACGCTTCACGAATTTGCG                                |
| <i>ASC</i> -F                     | CAGGACCTTCCCGTACAGAG                               |
| <i>ASC</i> -R                     | CAGGACCTTCCCGTACAGAG                               |
| <i>NLRP3</i> -F                   | ACGTAAGGCCAGAATTCACC                               |
| <i>NLRP3</i> -R                   | GAATGCCTTGGGAGACTCAG                               |
| <i>PDCD4</i> -F                   | TCCTCAGTCCCAGCATTTC                                |
| <i>PDCD4</i> -R                   | TGCAAGCGAAATTAAGGGAA                               |
| miR-205-F                         | GCCGCTTCCTTCATTCCACCGG                             |
| miR-205-R                         | GTGCAGGGTCCGAGGT                                   |
| miR-30a-F                         | GCCGCTTGTAACATCCTCGAC                              |
| miR-30a-R                         | GTGCAGGGTCCGAGGT                                   |
| miR-182-F                         | GCCGCTTTTGGCAATGGTAGAACT                           |

|                     |                          |
|---------------------|--------------------------|
| miR-182-R           | GTGCAGGGTCCGAGGT         |
| miR-30d-F           | GCCGCTTGTAACATCCCCGAC    |
| miR-30d-R           | GTGCAGGGTCCGAGGT         |
| miR-4792-F          | GCCGCTCGGTGAGCGCTC       |
| miR-4702-R          | GTGCAGGGTCCGAGGT         |
| let-7i-F            | GCCGCTTGAGGTAGTAGTTTGT   |
| let-7i-R            | GTGCAGGGTCCGAGGT         |
| miR-10a-F           | GCCGCTTACCCTGTAGATCCGAA  |
| miR-10a-R           | GTGCAGGGTCCGAGGT         |
| miR-191-F           | GCCGCTCAACGGAATCCCAAAG   |
| miR-191-R           | GTGCAGGGTCCGAGGT         |
| miR-1246-F          | GCCGCTAATGGATTTTGG       |
| miR-1246-R          | GTGCAGGGTCCGAGGT         |
| <i>Gapdh</i> -F (m) | CATGGCCTTCCGTGTTTCCTA    |
| <i>Gapdh</i> -R (m) | TGTCATCATACTTGGCAGGTTTCT |
| <i>Snail</i> -F (m) | CACACGCGTGCCTTGTGTCT     |
| <i>Snail</i> -F (m) | GGTCAGCAAAAAGCACGGTT     |
| pri-miR-21-F        | AATCCTGCCTGACTGTCCG      |
| pri-miR-21-R        | ATGTCAGACAGCCCATCGAC     |
